# Supplementary figures and images for: Synthesis and structure of the first clathrochelate iron(ii) tris-dioximates with inherent nitrile substituent(s) and new dehalogenation – reduction reaction at a quasi-aromatic macrobicyclic framework
Source: Royal Society of Chemistry journal article supplement (doi:10.1039/c1dt11285f), 2011-11-17

Electronic Supplementary Information

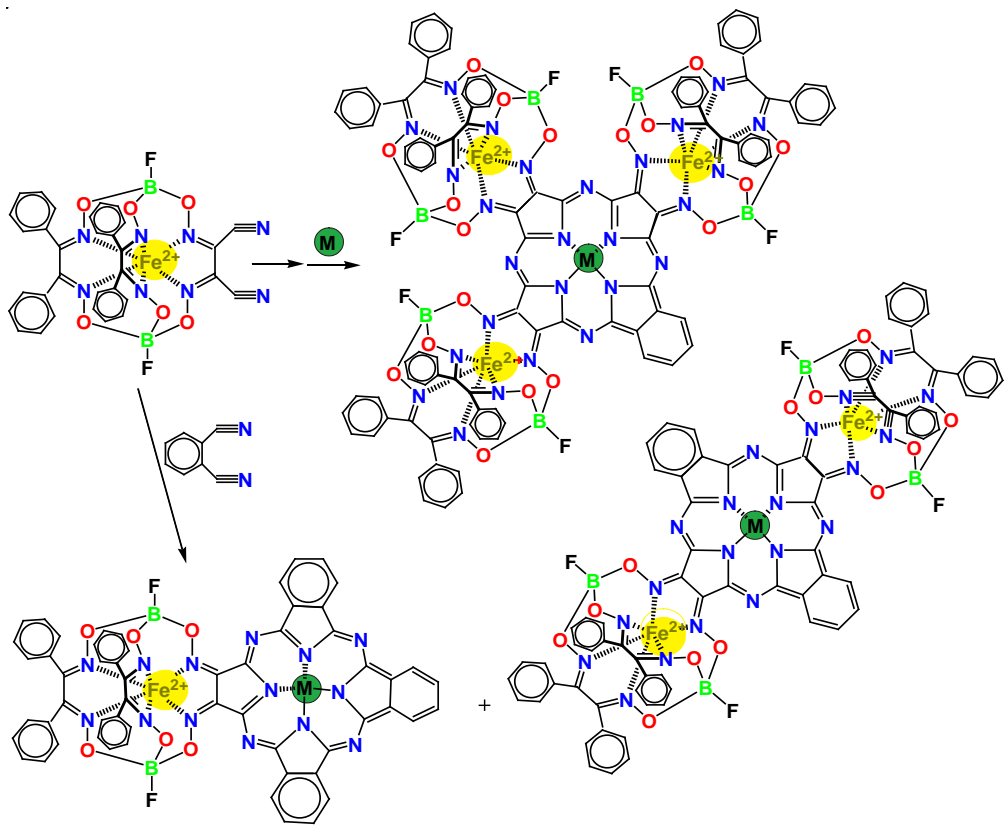

Scheme ESI1

Supplement: c1dt11285f.pdf [file c1dt11285f.pdf]
